# Supplementary material for: Improving Seasonally Frozen Ground Monitoring Using Soil Freezing Characteristic Curve in Permittivity–Temperature Space
Source: Copernicus journal article supplement (doi:10.5194/egusphere-2025-620), 2025-05-15
Supplement: Supplementary file 1 [file egusphere-2025-620-supplement.pdf]

# (Supplementary Material) Improving Seasonally Frozen Ground Monitoring Using Soil Freezing Characteristic Curve in Permittivity-Temperature Space

Hesam Salmabadi<sup>1,2</sup>, Renato Pardo Lara<sup>3</sup>, Aaron Berg<sup>3</sup>, Alex Mavrovic<sup>1,2,4</sup>, Chelene Hanes<sup>5</sup>, Benoit Montpetit<sup>6</sup>, and Alexandre Roy<sup>1,2</sup>

<sup>1</sup>Department of Environmental Sciences, University of Quebec in Trois-Rivières, Trois-Rivières, Quebec, Canada

<sup>2</sup>Centre d'Études Nordiques, Université Laval, Québec, Quebec, Canada

<sup>3</sup>Department of Geography, Environment & Geomatics, University of Guelph, Guelph, Ontario, Canada

<sup>4</sup>Department of Physics, Cégep de Sherbrooke, Sherbrooke, Quebec, Canada

<sup>5</sup>Great Lakes Forestry Centre, Canadian Forest Service, Natural Resources Canada, Sault Ste. Marie, Ontario, Canada

<sup>6</sup>Climate Research Division, Environment and Climate Change Canada, Toronto, Ontario, Canada

**Correspondence:** Hesam Salmabadi (hesam.salmabadi@uqtr.ca)

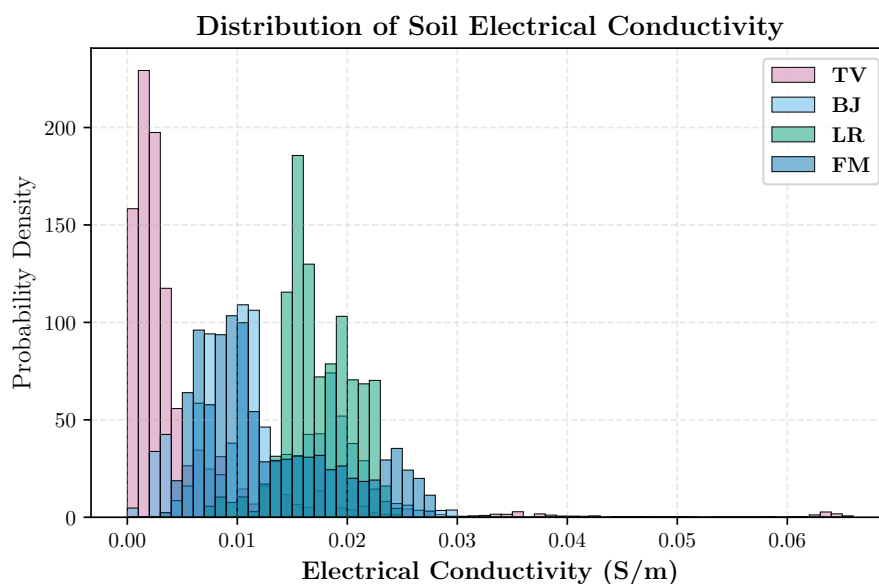

**Figure S1.** Histogram of electrical conductivity (EC) values measured at Trail Valley Creek (TV), James Bay (BJ), La Romaine (LR), and Montmorency Forest (FM) sites.

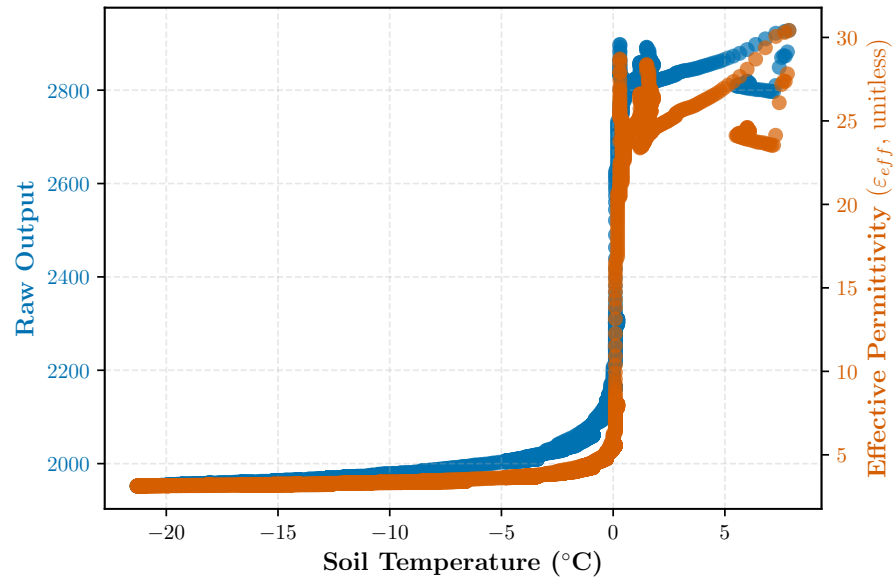

**Figure S2.** Soil Freezing Characteristic Curve (SFCC) visualized in both sensor raw output–temperature space and permittivity–temperature space. These representations highlight the freezing transition as captured directly by the sensor output and after conversion to effective permittivity.
